# Supplementary material for: Method Validation for Determination of Thallium by Inductively Coupled Plasma Mass Spectrometry and Monitoring of Various Foods in South Korea
Source: MDPI journal article supplement (doi:10.3390/molecules26216729), 2021-11-06

**Table S1.** Evaluation of intraday and interday accuracy and precision at low, medium, and high concentrations of thallium (Tl) in representative foods.

|                     | Intra-day                                       | Day 1 (n = 7)             |                               | Day 2 (n = 7)             |                               | Day 3 (n = 7)             |                  | Inter-day (n = 3)         |                               |
|---------------------|-------------------------------------------------|---------------------------|-------------------------------|---------------------------|-------------------------------|---------------------------|------------------|---------------------------|-------------------------------|
| Representative food | Nominal Concentration ( $\mu\text{g kg}^{-1}$ ) | Accuracy (%) <sup>a</sup> | Precision (%RSD) <sup>b</sup> | Accuracy (%) <sup>a</sup> | Precision (%RSD) <sup>b</sup> | Accuracy (%) <sup>a</sup> | Precision (%RSD) | Accuracy (%) <sup>a</sup> | Precision (%RSD) <sup>b</sup> |
| Rice                | 0.1                                             | 119.81                    | 3.97                          | 119.54                    | 1.98                          | 112.11                    | 3.16             | 110.44                    | 1.20                          |
|                     | 0.5                                             | 102.15                    | 2.66                          | 104.47                    | 2.22                          | 103.89                    | 2.28             | 100.34                    | 5.29                          |
|                     | 1.0                                             | 107.77                    | 1.58                          | 113.71                    | 5.74                          | 108.69                    | 1.32             | 102.98                    | 4.52                          |
| Apple               | 0.1                                             | 102.22                    | 4.46                          | 95.00                     | 5.19                          | 105.04                    | 5.68             | 103.04                    | 2.19                          |
|                     | 0.5                                             | 97.99                     | 0.99                          | 101.63                    | 1.38                          | 102.70                    | 2.02             | 98.33                     | 1.56                          |
|                     | 1.0                                             | 112.55                    | 4.25                          | 95.45                     | 3.75                          | 96.65                     | 2.04             | 94.75                     | 1.31                          |
| Beef                | 0.1                                             | 109.86                    | 3.09                          | 107.11                    | 3.17                          | 108.17                    | 2.56             | 109.99                    | 2.41                          |
|                     | 0.5                                             | 91.10                     | 1.79                          | 91.12                     | 2.79                          | 99.36                     | 1.59             | 98.71                     | 4.57                          |
|                     | 1.0                                             | 82.06                     | 1.63                          | 83.96                     | 0.88                          | 99.71                     | 2.83             | 97.13                     | 6.99                          |
| Sea salt            | 0.1                                             | 82.39                     | 4.43                          | 83.21                     | 3.36                          | 83.77                     | 5.39             | 94.94                     | 9.79                          |
|                     | 0.5                                             | 87.22                     | 4.85                          | 87.71                     | 2.06                          | 94.84                     | 6.85             | 92.05                     | 1.09                          |
|                     | 1.0                                             | 90.86                     | 6.28                          | 97.08                     | 3.32                          | 106.23                    | 9.08             | 101.42                    | 9.49                          |
| Orange juice        | 0.1                                             | 114.12                    | 2.96                          | 104.86                    | 1.58                          | 112.61                    | 5.22             | 107.30                    | 7.45                          |
|                     | 0.5                                             | 89.19                     | 1.98                          | 105.24                    | 3.02                          | 100.70                    | 2.03             | 102.71                    | 5.99                          |
|                     | 1.0                                             | 113.07                    | 1.70                          | 100.00                    | 1.52                          | 94.94                     | 2.05             | 96.11                     | 6.20                          |
| Sesame oil          | 0.1                                             | 116.62                    | 2.44                          | 110.30                    | 5.09                          | 117.98                    | 3.80             | 107.54                    | 6.12                          |
|                     | 0.5                                             | 114.11                    | 3.44                          | 114.77                    | 3.10                          | 118.89                    | 2.48             | 107.48                    | 5.61                          |
|                     | 1.0                                             | 115.62                    | 2.16                          | 120.00                    | 1.31                          | 119.95                    | 2.30             | 103.70                    | 4.61                          |

<sup>a</sup> (Mean measured concentration / nominal concentration)  $\times$  100; <sup>b</sup> (Standard deviation / mean)  $\times$  100; RSD = relative standard deviation.

**Table S2.** TI content (fresh weight) in specific items of agricultural products.

| Category (n)          | Item (n)                 | Min – Max<br>( $\mu\text{g kg}^{-1}$ ) | Mean $\pm$ SD<br>( $\mu\text{g kg}^{-1}$ ) |
|-----------------------|--------------------------|----------------------------------------|--------------------------------------------|
| Grains (32)           | Rice (3)                 | 0.00 – 0.00                            | 0.00 $\pm$ 0.00                            |
|                       | Brown rice (3)           | 0.43 – 0.47                            | 0.45 $\pm$ 0.01                            |
|                       | Barley (3)               | 0.00 – 0.00                            | 0.00 $\pm$ 0.00                            |
|                       | Corn (4)                 | 0.00 – 0.53                            | 0.14 $\pm$ 0.23                            |
|                       | Glutinous millet (3)     | 3.46 – 4.39                            | 4.07 $\pm$ 0.43                            |
|                       | Sorghum (3)              | 0.66 – 5.27                            | 3.02 $\pm$ 1.88                            |
|                       | Oat (4)                  | 0.00 – 0.00                            | 0.00 $\pm$ 0.00                            |
|                       | Glutinous rice (3)       | 0.00 – 0.45                            | 0.15 $\pm$ 0.21                            |
|                       | Proso millet (3)         | 0.00 – 0.49                            | 0.30 $\pm$ 0.21                            |
|                       | Adlay (3)                | 0.44 – 0.83                            | 0.62 $\pm$ 0.16                            |
| Beans (10)            | Soybean (3)              | 0.00 – 2.31                            | 1.32 $\pm$ 0.97                            |
|                       | Black bean (3)           | 0.00 – 0.89                            | 0.30 $\pm$ 0.42                            |
|                       | Kidney bean (4)          | 0.00 – 0.00                            | 0.00 $\pm$ 0.00                            |
| Fruits (9)            | Apple (3)                | 0.02 – 0.47                            | 0.28 $\pm$ 0.19                            |
|                       | Pear (3)                 | 0.83 – 7.00                            | 4.14 $\pm$ 2.54                            |
|                       | Mandarin (3)             | 0.02 – 0.02                            | 0.02 $\pm$ 0.00                            |
| Tubers (6)            | Potato (3)               | 3.78 – 4.34                            | 4.04 $\pm$ 0.23                            |
|                       | Sweet potato (3)         | 5.92 – 13.21                           | 9.29 $\pm$ 3.00                            |
| Mushrooms (6)         | King oyster mushroom (3) | 0.02 – 0.02                            | 0.02 $\pm$ 0.00                            |
|                       | Winter mushroom (3)      | 0.02 – 0.02                            | 0.02 $\pm$ 0.00                            |
| Root vegetables (19)  | White radish (3)         | 2.74 – 7.11                            | 5.08 $\pm$ 1.80                            |
|                       | Carrot (3)               | 0.02 – 2.06                            | 0.86 $\pm$ 0.87                            |
|                       | Garlic (4)               | 0.02 – 3.28                            | 1.28 $\pm$ 1.22                            |
|                       | Onion (3)                | 0.02 – 0.40                            | 0.26 $\pm$ 0.17                            |
|                       | Burdock root (3)         | 0.02 – 0.78                            | 0.28 $\pm$ 0.35                            |
|                       | Ginseng (3)              | 1.46 – 6.85                            | 4.32 $\pm$ 2.22                            |
| Leafy vegetables (19) | Perilla leaf (3)         | 0.02 – 0.34                            | 0.23 $\pm$ 0.14                            |
|                       | Chinese cabbage (3)      | 0.20 – 0.47                            | 0.34 $\pm$ 0.11                            |
|                       | Lettuce (3)              | 0.11 – 13.63                           | 4.69 $\pm$ 6.32                            |
|                       | Spinach (3)              | 0.80 – 4.53                            | 2.26 $\pm$ 1.63                            |
|                       | Cabbage (4)              | 0.02 – 15.93                           | 4.13 $\pm$ 6.82                            |
|                       | Spring onion (3)         | 0.17 – 0.93                            | 0.55 $\pm$ 0.31                            |
| Other vegetables (12) | Eggplant (3)             | 0.02 – 0.49                            | 0.22 $\pm$ 0.27                            |
|                       | Red pepper (3)           | 0.02 – 0.60                            | 0.02 $\pm$ 0.00                            |
|                       | Zucchini (3)             | 0.02 – 0.02                            | 0.02 $\pm$ 0.00                            |
|                       | Cucumber (3)             | 0.02 – 0.02                            | 0.02 $\pm$ 0.00                            |

<sup>a</sup> n is number of samples; <sup>b</sup> results < MLOD were set equal to 1/2 MLOD values.

**Table S3.** TI content (fresh weight) of specific items in livestock products.

| Category (n) <sup>a</sup> | Item (n) <sup>a</sup> | Min – Max<br>( $\mu\text{g kg}^{-1}$ ) | Mean $\pm$ SD<br>( $\mu\text{g kg}^{-1}$ ) |
|---------------------------|-----------------------|----------------------------------------|--------------------------------------------|
| Eggs (3)                  | Eggs (3)              | 0.65 – 5.72                            | 2.46 $\pm$ 2.31                            |
| Meats (9)                 | Chicken (3)           | 0.62 – 1.63                            | 1.19 $\pm$ 0.42                            |
|                           | Pork (3)              | 0.54 – 0.65                            | 0.59 $\pm$ 0.05                            |
|                           | Beef (3)              | 0.51 – 0.67                            | 0.58 $\pm$ 0.07                            |

<sup>a</sup> n is number of samples; <sup>b</sup> results < MLOD were set equal to 1/2 MLOD values.

**Table S4.** TI content (fresh weight) of specific items in fishery products.

| Category (n) <sup>a</sup> | Item (n) <sup>a</sup>    | Min – Max <sup>b</sup><br>( $\mu\text{g kg}^{-1}$ ) | Mean $\pm$ SD <sup>b</sup><br>( $\mu\text{g kg}^{-1}$ ) |
|---------------------------|--------------------------|-----------------------------------------------------|---------------------------------------------------------|
| Fishes (21)               | Hairtail (3)             | 0.81 – 0.97                                         | 0.90 $\pm$ 0.07                                         |
|                           | Mackerel (3)             | 1.04 – 1.18                                         | 1.12 $\pm$ 0.06                                         |
|                           | Flatfish (3)             | 0.41 – 0.89                                         | 0.62 $\pm$ 0.20                                         |
|                           | Cod (3)                  | 0.57 – 1.22                                         | 0.96 $\pm$ 0.28                                         |
|                           | Walleye pollock (3)      | 1.03 – 1.21                                         | 1.12 $\pm$ 0.07                                         |
|                           | Spanish mackerel (3)     | 0.76 – 1.79                                         | 1.44 $\pm$ 0.48                                         |
|                           | Small yellow croaker (3) | 0.91 – 1.87                                         | 1.24 $\pm$ 0.45                                         |
| Cephalopoda (6)           | Squid (3)                | 1.07 – 1.10                                         | 1.08 $\pm$ 0.02                                         |
|                           | Octopus (3)              | 1.04 – 1.22                                         | 1.11 $\pm$ 0.08                                         |
| Shellfishes (10)          | Oyster (3)               | 1.20 – 2.05                                         | 1.65 $\pm$ 0.35                                         |
|                           | Manila clam (4)          | 1.30 – 6.02                                         | 3.32 $\pm$ 1.94                                         |
|                           | Mussel (3)               | 1.70 – 3.17                                         | 2.43 $\pm$ 0.60                                         |
| Crustaceans (4)           | Crab (4)                 | 1.07 – 1.79                                         | 1.28 $\pm$ 0.29                                         |
| Sea algae (9)             | Laver (3)                | 0.02 – 5.21                                         | 1.75 $\pm$ 2.44                                         |
|                           | Sea mustard (3)          | 0.02 – 12.72                                        | 4.26 $\pm$ 5.99                                         |
|                           | Hijiki (3)               | 0.02 – 0.02                                         | 0.02 $\pm$ 0.00                                         |

<sup>a</sup> n is number of samples; <sup>b</sup> results < MLOD were set equal to 1/2 MLOD values.

**Table S5.** Tl content (fresh weight) of specific items in beverages.

| Category (n) <sup>a</sup> | Item (n) <sup>a</sup>     | Min – Max <sup>b</sup><br>( $\mu\text{g kg}^{-1}$ ) | Mean $\pm$ SD <sup>b</sup><br>( $\mu\text{g kg}^{-1}$ ) |
|---------------------------|---------------------------|-----------------------------------------------------|---------------------------------------------------------|
| Infusion teas (18)        | Mate tea (3)              | 0.77 – 1.99                                         | 1.50 $\pm$ 0.53                                         |
|                           | Solomon-seal root tea (3) | 0.72 – 1.61                                         | 1.17 $\pm$ 0.36                                         |
|                           | Black tea (3)             | 0.47 – 0.73                                         | 0.58 $\pm$ 0.11                                         |
|                           | Barley tea (3)            | 0.01 – 0.50                                         | 0.17 $\pm$ 0.23                                         |
|                           | Brown rice tea (3)        | 0.01 – 0.60                                         | 0.21 $\pm$ 0.28                                         |
|                           | Buckwheat tea (3)         | 0.01 – 0.01                                         | 0.01 $\pm$ 0.00                                         |
| Other beverages (21)      | Red ginseng drink (3)     | 1.30 – 4.12                                         | 2.49 $\pm$ 1.19                                         |
|                           | Fruit juice (3)           | 0.60 – 0.73                                         | 0.68 $\pm$ 0.06                                         |
|                           | Soybean milk (3)          | 0.01 – 0.70                                         | 0.24 $\pm$ 0.33                                         |
|                           | Corn silk drink (3)       | 0.01 – 0.01                                         | 0.01 $\pm$ 0.00                                         |
|                           | Sports drink (3)          | 0.01 – 0.01                                         | 0.01 $\pm$ 0.00                                         |
|                           | Instant coffee (3)        | 0.01 – 0.01                                         | 0.01 $\pm$ 0.00                                         |

<sup>a</sup> n is number of samples; <sup>b</sup> results < MLOD were set equal to 1/2 MLOD values.

**Table S6.** Tl content (fresh weight) of specific items in other processed foods.

| Category (n) <sup>a</sup>     | Item (n) <sup>a</sup>             | Min – Max <sup>b</sup><br>( $\mu\text{g kg}^{-1}$ ) | Mean $\pm$ SD <sup>b</sup><br>( $\mu\text{g kg}^{-1}$ ) |
|-------------------------------|-----------------------------------|-----------------------------------------------------|---------------------------------------------------------|
| Snacks (6)                    | Potato crisp (3)                  | 1.59 – 6.73                                         | 3.49 $\pm$ 2.30                                         |
|                               | Fruit jelly (3)                   | 0.45 – 0.60                                         | 0.51 $\pm$ 0.07                                         |
| Salted processed seafood (12) | Fish cake (3)                     | 0.94 – 1.41                                         | 1.19 $\pm$ 0.19                                         |
|                               | Fermented pollock roe (3)         | 0.01 – 0.01                                         | 0.01 $\pm$ 0.00                                         |
|                               | Fermented squid (3)               | 0.01 – 0.01                                         | 0.01 $\pm$ 0.00                                         |
|                               | Seasoned laver (3)                | 0.01 – 0.01                                         | 0.01 $\pm$ 0.00                                         |
| Pickled foods (12)            | Radish kimchi (3)                 | 0.01 – 19.46                                        | 1.63 $\pm$ 5.38                                         |
|                               | Chinese cabbage kimchi (3)        | 0.01 – 0.01                                         | 0.01 $\pm$ 0.00                                         |
|                               | Spring onion kimchi (3)           | 0.01 – 0.01                                         | 0.01 $\pm$ 0.00                                         |
|                               | Pickled radish (3)                | 0.01 – 0.01                                         | 0.01 $\pm$ 0.00                                         |
| Sauces (18)                   | Soybean sauce (3)                 | 0.01 – 0.01                                         | 0.01 $\pm$ 0.00                                         |
|                               | Red pepper paste (3)              | 0.01 – 0.01                                         | 0.01 $\pm$ 0.00                                         |
|                               | Fermented soybean paste (3)       | 0.01 – 0.01                                         | 0.01 $\pm$ 0.00                                         |
|                               | Extra-fermented soybean paste (3) | 0.01 – 0.01                                         | 0.01 $\pm$ 0.00                                         |
|                               | Black soybean paste (3)           | 0.01 – 0.01                                         | 0.01 $\pm$ 0.00                                         |
|                               | Mixed seasoning paste (3)         | 0.01 – 0.01                                         | 0.01 $\pm$ 0.00                                         |
| Oil products (27)             | Corn oil (3)                      | 0.01 – 0.01                                         | 0.01 $\pm$ 0.00                                         |
|                               | Olive oil (3)                     | 0.01 – 0.01                                         | 0.01 $\pm$ 0.00                                         |
|                               | Rape seed oil (3)                 | 0.01 – 0.01                                         | 0.01 $\pm$ 0.00                                         |
|                               | Sesame oil (3)                    | 0.01 – 0.01                                         | 0.01 $\pm$ 0.00                                         |
|                               | Soybean oil (3)                   | 0.01 – 0.01                                         | 0.01 $\pm$ 0.00                                         |
|                               | Sunflower seed oil (3)            | 0.01 – 0.01                                         | 0.01 $\pm$ 0.00                                         |
|                               | Grape seed oil (3)                | 0.01 – 0.01                                         | 0.01 $\pm$ 0.00                                         |
|                               | Perilla oil (3)                   | 0.01 – 0.01                                         | 0.01 $\pm$ 0.00                                         |
|                               | Magarine (3)                      | 0.01 – 0.01                                         | 0.01 $\pm$ 0.00                                         |
| Dairy products (6)            | Butter (3)                        | 0.01 – 0.01                                         | 0.01 $\pm$ 0.00                                         |
|                               | Yogurt (3)                        | 0.01 – 0.01                                         | 0.01 $\pm$ 0.00                                         |
| Grain products (3)            | Flour (3)                         | 0.00 – 0.00                                         | 0.00 $\pm$ 0.00                                         |
| Livestock processed foods (3) | Ham (3)                           | 0.01 – 0.01                                         | 0.01 $\pm$ 0.00                                         |
| Noodles (3)                   | Instant noodles (Ramen) (3)       | 0.01 – 0.01                                         | 0.01 $\pm$ 0.00                                         |

<sup>a</sup> n is number of samples; <sup>b</sup> results < MLOD were set equal to 1/2 MLOD values.

**Table S7.** Estimated dietary exposure to TI by age (Lower Bound).

| Food Group            |                          | Exposure ( $\mu\text{g kg}^{-1}\text{ kw day}^{-1}$ ) |               |               |               |               |                   |
|-----------------------|--------------------------|-------------------------------------------------------|---------------|---------------|---------------|---------------|-------------------|
|                       |                          | 0 – 2 years                                           | 3 – 6 years   | 7 – 12 years  | 13 – 19 years | 20 – 64 years | 65 years and over |
| Agricultural products | Cereals                  | 0.0000-0.0002                                         | 0.0000-0.0001 | 0.0000-0.0001 | 0.0000-0.0001 | 0.0000-0.0001 | 0.0000-0.0001     |
|                       | Fruits                   | 0.0000-0.0064                                         | 0.0000-0.0036 | 0.0000-0.0014 | 0.0000-0.0008 | 0.0000-0.0010 | 0.0000-0.0013     |
|                       | Beans                    | 0.0000-0.0001                                         | 0.0000-0.0001 | 0.0000-0.0001 | 0.0000-0.0001 | 0.0000-0.0001 | 0.0000-0.0002     |
|                       | Mushrooms                | 0.0000                                                | 0.0000        | 0.0000        | 0.0000        | 0.0000        | 0.0000            |
|                       | Tubers                   | 0.0035-0.0119                                         | 0.0021-0.0047 | 0.0012-0.0027 | 0.0006-0.0018 | 0.0011-0.0026 | 0.0009-0.0043     |
|                       | Vegetables               | 0.0000-0.0055                                         | 0.0000-0.0031 | 0.0000-0.0028 | 0.0000-0.0023 | 0.0000-0.0031 | 0.0000-0.0032     |
| Livestock products    | Eggs                     | 0.0012-0.0104                                         | 0.0010-0.0086 | 0.0006-0.0052 | 0.0003-0.0028 | 0.0003-0.0027 | 0.0002-0.0016     |
|                       | Meats                    | 0.0001-0.0013                                         | 0.0002-0.0012 | 0.0002-0.0016 | 0.0001-0.0015 | 0.0001-0.0008 | 0.0000-0.0002     |
| Fishery products      | Crustaceans              | 0.0000-0.0000                                         | 0.0000-0.0000 | 0.0000-0.0000 | 0.0000-0.0000 | 0.0000-0.0000 | 0.0000-0.0000     |
|                       | Fishes                   | 0.0000-0.0002                                         | 0.0000-0.0001 | 0.0000-0.0001 | 0.0000-0.0000 | 0.0000-0.0001 | 0.0000-0.0001     |
|                       | Cephalopoda              | 0.0000-0.0001                                         | 0.0000-0.0001 | 0.0000-0.0001 | 0.0000-0.0001 | 0.0000-0.0001 | 0.0000-0.0001     |
|                       | Shellfishes              | 0.0000-0.0004                                         | 0.0000-0.0003 | 0.0000-0.0001 | 0.0000-0.0001 | 0.0000-0.0001 | 0.0000-0.0001     |
|                       | Sea algae                | 0.0000-0.0006                                         | 0.0000-0.0004 | 0.0000-0.0002 | 0.0000-0.0001 | 0.0000-0.0002 | 0.0000-0.0002     |
| Processed products    | Beverages                | 0.0000-0.0017                                         | 0.0000-0.0016 | 0.0000-0.0007 | 0.0000-0.0006 | 0.0000-0.0003 | 0.0000-0.0001     |
|                       | Other processes products | 0.0000-0.0003                                         | 0.0000-0.0005 | 0.0000-0.0009 | 0.0000-0.0005 | 0.0000-0.0014 | 0.0000-0.0016     |

**Table S8.** Estimated dietary exposure to Tl by age (Upper Bound).

| Food Group            |                          | Exposure ( $\mu\text{g kg}^{-1}\text{kw day}^{-1}$ ) |               |               |               |               |               |
|-----------------------|--------------------------|------------------------------------------------------|---------------|---------------|---------------|---------------|---------------|
|                       |                          | 0 – 2 Years                                          | 3 – 6 Years   | 7 – 12 Years  | 13 – 19 Years | 20 – 64 Years | Over 65 Years |
| Agricultural products | Cereals                  | 0.0000-0.0002                                        | 0.0000-0.0001 | 0.0000-0.0001 | 0.0000-0.0001 | 0.0000-0.0001 | 0.0000-0.0001 |
|                       | Fruits                   | 0.0000-0.0064                                        | 0.0000-0.0036 | 0.0000-0.0014 | 0.0000-0.0008 | 0.0000-0.0010 | 0.0000-0.0013 |
|                       | Beans                    | 0.0000-0.0001                                        | 0.0000-0.0001 | 0.0000-0.0001 | 0.0000-0.0001 | 0.0000-0.0001 | 0.0000-0.0002 |
|                       | Mushrooms                | 0.0000                                               | 0.0000        | 0.0000        | 0.0000        | 0.0000        | 0.0000        |
|                       | Tubers                   | 0.0035-0.0119                                        | 0.0021-0.0047 | 0.0012-0.0027 | 0.0006-0.0018 | 0.0011-0.0026 | 0.0009-0.0043 |
|                       | Vegetables               | 0.0000-0.0055                                        | 0.0000-0.0031 | 0.0000-0.0028 | 0.0000-0.0023 | 0.0000-0.0031 | 0.0000-0.0032 |
| Livestock products    | Eggs                     | 0.0012-0.0104                                        | 0.0010-0.0086 | 0.0006-0.0052 | 0.0003-0.0028 | 0.0003-0.0027 | 0.0002-0.0016 |
|                       | Meats                    | 0.0001-0.0013                                        | 0.0002-0.0012 | 0.0002-0.0016 | 0.0001-0.0015 | 0.0001-0.0008 | 0.0000-0.0002 |
| Fishery products      | Crustaceans              | 0.0000-0.0000                                        | 0.0000-0.0000 | 0.0000-0.0000 | 0.0000-0.0000 | 0.0000-0.0000 | 0.0000-0.0000 |
|                       | Fishes                   | 0.0000-0.0002                                        | 0.0000-0.0001 | 0.0000-0.0001 | 0.0000-0.0000 | 0.0000-0.0001 | 0.0000-0.0001 |
|                       | Cephalopoda              | 0.0000-0.0001                                        | 0.0000-0.0001 | 0.0000-0.0001 | 0.0000-0.0001 | 0.0000-0.0001 | 0.0000-0.0001 |
|                       | Shellfishes              | 0.0000-0.0004                                        | 0.0000-0.0003 | 0.0000-0.0001 | 0.0000-0.0001 | 0.0000-0.0001 | 0.0000-0.0001 |
|                       | Sea algae                | 0.0000-0.0006                                        | 0.0000-0.0004 | 0.0000-0.0002 | 0.0000-0.0001 | 0.0000-0.0002 | 0.0000-0.0002 |
| Processed products    | Beverages                | 0.0000-0.0017                                        | 0.0000-0.0016 | 0.0000-0.0007 | 0.0000-0.0006 | 0.0000-0.0003 | 0.0000-0.0001 |
|                       | Other processes products | 0.0000-0.0003                                        | 0.0000-0.0005 | 0.0000-0.0009 | 0.0000-0.0005 | 0.0000-0.0014 | 0.0000-0.0016 |

**Table S9.** Instrumental conditions of ICP-MS for the determination of Tl.

| Parameters     | Conditions                  |
|----------------|-----------------------------|
| Instrument     | Agilent ICP-MS 7700x        |
| R.F. Matching  | 27.12 MHz                   |
| R.F. Power     | 1550 W                      |
| Carrier gas    | Ar 1.10 L min <sup>-1</sup> |
| Collision mode | He 4.0 mL/min <sup>-1</sup> |
| Ion monitored  | m/z 203, 205                |
| Lens voltage   | 10 V                        |
| Plasma gas     | 15 L min <sup>-1</sup>      |
| Axillary gas   | 1.0 L min <sup>-1</sup>     |

**Figure S1.** Fish-bone diagram for Tl analysis uncertainty for rice.

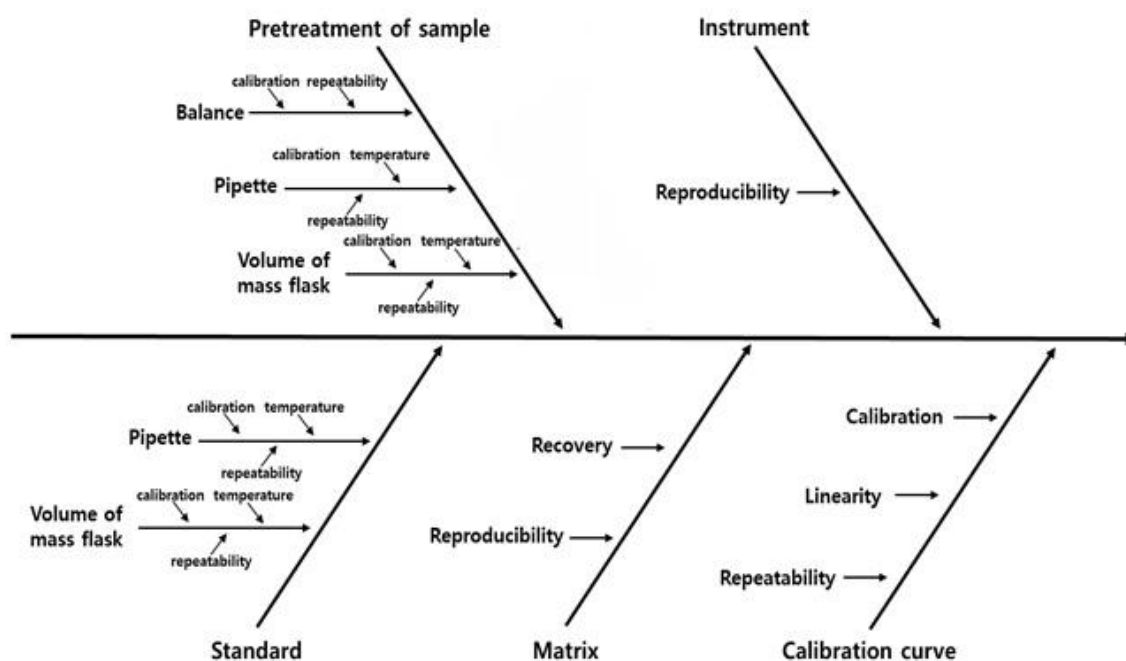

Supplement: s1 [file s1]
